# Supplementary material
Source: PubMed Central journal article supplement (PMC5878132)
Supplement: NIHMS943152-supplement-1.pdf [file NIHMS943152-supplement-1.pdf]

## ESM Figures

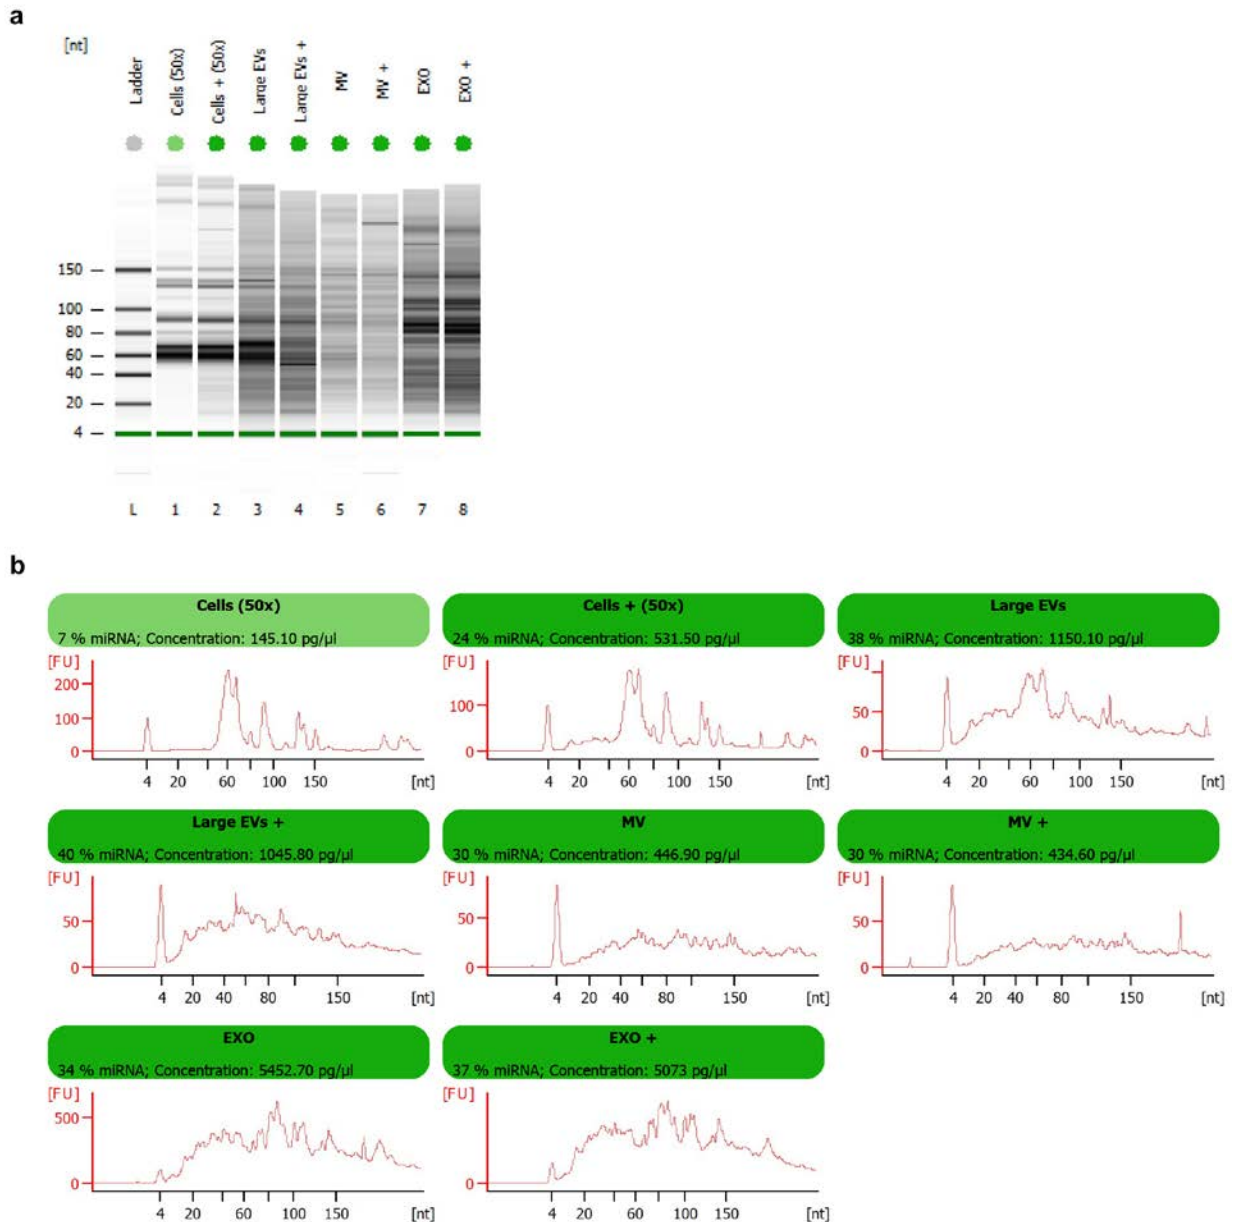

ESM Fig. 1 Spectral analysis of (a) small RNAs from MIN6 cell samples treated with vehicle or cytokines. (b) Spectral analyses of microRNAs in vehicle or cytokine treated MIN6 cells and EV subpopulations from their corresponding cell culture media. “+” indicates cytokine treated samples. “50x” in cellular RNA samples indicates the fold of sample dilutions prior to analyses. Representative data shown.

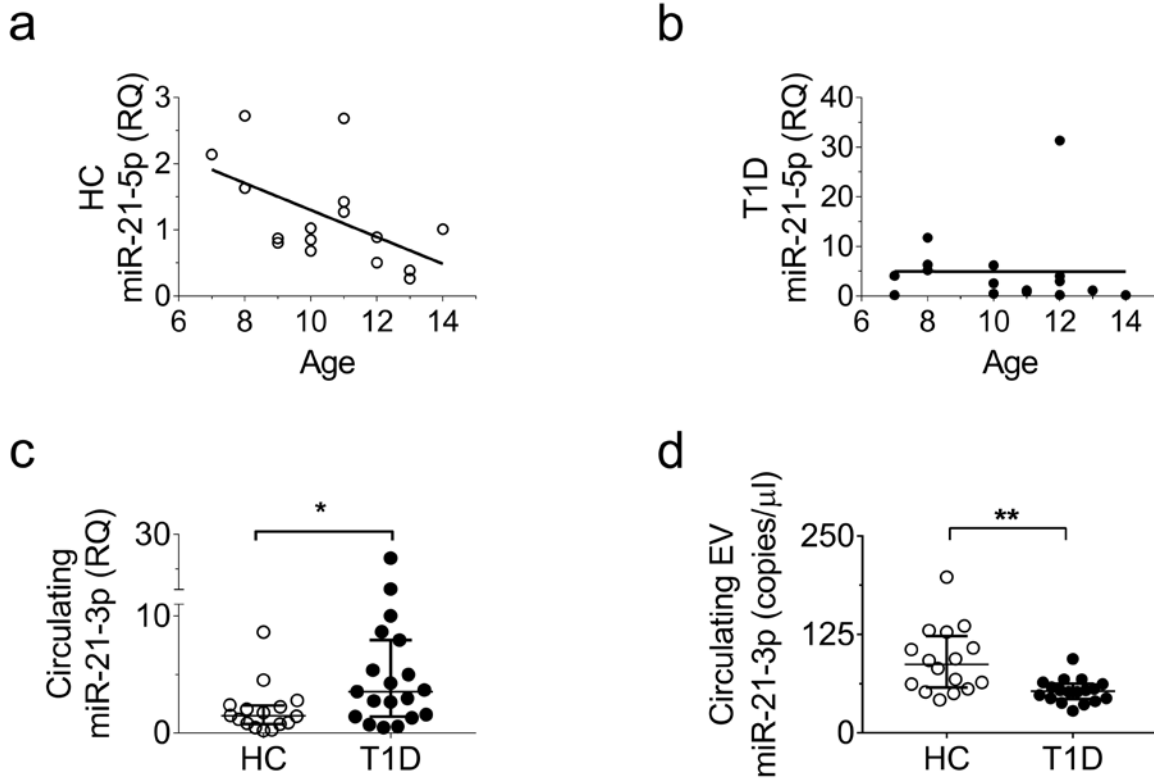

ESM Fig. 2. Serum samples from healthy pediatric controls (HC; white circles) and new-onset pediatric type 1 diabetes individuals (T1D; black circles) were assessed. **(a-b)** Correlations between relative serum EV miR-21-5p and age (HC:  $r_s = -0.506$ ,  $p = 0.0474$ ; T1D:  $r_s = -0.2627$ ,  $p = 0.3230$ ). **(c-d)** Relative levels of circulating miR-21-3p were assessed in **(c)** total serum by qPCR and **(d)** in circulating EVs by digital droplet PCR. Results are shown as median  $\pm$  interquartile range. HC:  $n = 16$ , T1D:  $n = 19$ .
